# Supplementary material for: Computer-aided diagnostic system based on deep learning for classifying colposcopy images
Source: PubMed Central journal article supplement — Ann Transl Med. 2021 Jul;9(13):1045. doi: 10.21037/atm-21-885 (PMC8339824; doi:10.21037/atm-21-885), 2021-07
Supplement: atm-09-13-1045-dss.pdf [file atm-09-13-1045-dss.pdf]

## Data Sharing Statement

|                     |                                                                                                                                                    |                                                                                                                                             |
|---------------------|----------------------------------------------------------------------------------------------------------------------------------------------------|---------------------------------------------------------------------------------------------------------------------------------------------|
| <b>Article Info</b> | <a href="http://dx.doi.org/10.21037/atm-21-885">http://dx.doi.org/10.21037/atm-21-885</a>                                                          |                                                                                                                                             |
| <b>Item</b>         | <b>Question</b>                                                                                                                                    | <b>Authors' Response<br/>(place "-" if not applicable)</b>                                                                                  |
| 1                   | Would you like to share data collected for your study to others?                                                                                   | Yes                                                                                                                                         |
| 2                   | If not, would you like to share the reason for your decision?                                                                                      | -                                                                                                                                           |
| 3                   | What data in particular will be shared?                                                                                                            | The data including clinical features, colposcopy images morphological features will be shared.                                              |
| 4                   | Any other documents will be share? Such as study protocol, statistical analysis plan, informed consent form, clinical study report, analytic code. | Statistical analysis plan and study protocol will also be shared if requested.                                                              |
| 5                   | When will data availability begin?                                                                                                                 | From the publication date                                                                                                                   |
| 6                   | When will data availability end?                                                                                                                   | One years within the publication date, since the colposcopy images technique may be updated over time.                                      |
| 7                   | To whom will you share the data?                                                                                                                   | Clinician who are interested in the studies.                                                                                                |
| 8                   | For what type of analysis or purpose?                                                                                                              | Establish a combination of colposcopy image features and clinical features based on deep learning predict the severity of cervical lesions. |
| 9                   | How or where can the data/documents be obtained?                                                                                                   | Emails could be sent to the address below to obtain the shared data: liyangliulu@163.com                                                    |
| 10                  | Any other restrictions?                                                                                                                            | We may balance the potential benefits and risks for each request and then provide the data that could be shared.                            |
