# Supplementary material for: Computer-aided diagnostic system based on deep learning for classifying colposcopy images
Source: PubMed Central journal article supplement — Ann Transl Med. 2021 Jul;9(13):1045. doi: 10.21037/atm-21-885 (PMC8339824; doi:10.21037/atm-21-885), 2021-07
Supplement: atm-09-13-1045-supplementary.pdf [file atm-09-13-1045-supplementary.pdf]

**Table S1** The classification results at different age groups (NC vs. LSIL+)

| Model          | AUC                 | Accuracy            | Sensitivity         | Specificity         | PPV                 | NPV                 |
|----------------|---------------------|---------------------|---------------------|---------------------|---------------------|---------------------|
| Clinical only  | 0.692 (0.668–0.715) | 0.681 (0.657–0.705) | 0.644 (0.607–0.680) | 0.713 (0.681–0.744) | 0.657 (0.620–0.693) | 0.710 (0.668–0.732) |
| Age <50        | 0.685 (0.658–0.711) | 0.674 (0.646–0.700) | 0.623 (0.582–0.662) | 0.719 (0.683–0.754) | 0.668 (0.626–0.708) | 0.678 (0.641–0.713) |
| Age ≥50        | 0.728 (0.673–0.779) | 0.714 (0.658–0.765) | 0.750 (0.661–0.826) | 0.690 (0.615–0.757) | 0.617 (0.531–0.698) | 0.805 (0.733–0.866) |
| CNN only       | 0.945 (0.933–0.956) | 0.882 (0.865–0.898) | 0.901 (0.876–0.922) | 0.867 (0.841–0.890) | 0.853 (0.825–0.878) | 0.910 (0.888–0.930) |
| Age <50        | 0.942 (0.928–0.955) | 0.877 (0.858–0.895) | 0.907 (0.880–0.930) | 0.851 (0.821–0.878) | 0.847 (0.816–0.874) | 0.910 (0.884–0.931) |
| Age ≥50        | 0.955 (0.924–0.976) | 0.903 (0.863–0.935) | 0.871 (0.796–0.926) | 0.925 (0.876–0.960) | 0.886 (0.813–0.938) | 0.915 (0.863–0.952) |
| CNN + clinical | 0.953 (0.941–0.963) | 0.886 (0.869–0.901) | 0.932 (0.911–0.950) | 0.846 (0.819–0.870) | 0.838 (0.810–0.863) | 0.936 (0.916–0.953) |
| Age <50        | 0.951 (0.937–0.962) | 0.882 (0.862–0.899) | 0.938 (0.915–0.956) | 0.831 (0.799–0.859) | 0.833 (0.803–0.862) | 0.936 (0.913–0.955) |
| Age ≥50        | 0.962 (0.932–0.981) | 0.903 (0.863–0.935) | 0.905 (0.837–0.952) | 0.902 (0.848–0.942) | 0.861 (0.786–0.917) | 0.935 (0.886–0.967) |

Data were presented with 95% CIs. NC, normal cervix; LSIL, low-grade squamous intraepithelial lesions; AUC, receiver operating characteristic curve; PPV, positive predictive value; NPV, negative predictive value; CNN, convolutional neural network; CI, confidence interval.

**Table S2** The classification results at different age groups (HSIL- vs. HSIL+)

| Model          | AUC                 | Accuracy            | Sensitivity         | Specificity         | PPV                 | NPV                 |
|----------------|---------------------|---------------------|---------------------|---------------------|---------------------|---------------------|
| Clinical only  | 0.700 (0.676–0.723) | 0.675 (0.650–0.698) | 0.724 (0.679–0.766) | 0.655 (0.626–0.684) | 0.451 (0.414–0.490) | 0.858 (0.833–0.881) |
| Age <50        | 0.691 (0.664–0.717) | 0.671 (0.644–0.697) | 0.705 (0.653–0.753) | 0.658 (0.625–0.689) | 0.443 (0.401–0.486) | 0.852 (0.823–0.878) |
| Age ≥50        | 0.735 (0.680–0.785) | 0.690 (0.632–0.742) | 0.800 (0.699–0.879) | 0.644 (0.574–0.709) | 0.482 (0.397–0.568) | 0.886 (0.824–0.932) |
| CNN only       | 0.887 (0.870–0.903) | 0.797 (0.776–0.818) | 0.802 (0.761–0.839) | 0.796 (0.770–0.819) | 0.606 (0.564–0.647) | 0.911 (0.891–0.928) |
| Age <50        | 0.878 (0.859–0.896) | 0.783 (0.759–0.806) | 0.814 (0.769–0.854) | 0.771 (0.742–0.798) | 0.579 (0.533–0.623) | 0.915 (0.892–0.934) |
| Age ≥50        | 0.928 (0.892–0.955) | 0.859 (0.813–0.897) | 0.753 (0.647–0.840) | 0.902 (0.853–0.939) | 0.762 (0.657–0.848) | 0.898 (0.848–0.936) |
| CNN + clinical | 0.900 (0.884–0.915) | 0.807 (0.786–0.826) | 0.823 (0.783–0.858) | 0.800 (0.775–0.823) | 0.618 (0.576–0.658) | 0.920 (0.901–0.937) |
| Age <50        | 0.892 (0.873–0.909) | 0.791 (0.767–0.814) | 0.826 (0.781–0.865) | 0.778 (0.749–0.805) | 0.589 (0.544–0.634) | 0.920 (0.899–0.939) |
| Age ≥50        | 0.937 (0.903–0.962) | 0.872 (0.828–0.909) | 0.812 (0.712–0.888) | 0.898 (0.848–0.935) | 0.767 (0.666–0.849) | 0.920 (0.873–0.954) |

Data were presented with 95% CIs. HSIL, high-grade squamous intraepithelial lesions; AUC, receiver operating characteristic curve; PPV, positive predictive value; NPV, negative predictive value; CNN, convolutional neural network; CI, confidence interval.
